# Supplementary material for: The Polymorphisms in GSTO Genes (GSTO1 rs4925, GSTO2 rs156697, and GSTO2 rs2297235) Affect the Risk for Testicular Germ Cell Tumor Development: A Pilot Study
Source: MDPI journal article supplement (doi:10.3390/life13061269), 2023-05-27
Supplement: s1 [file s1]

## Supplementary Materials

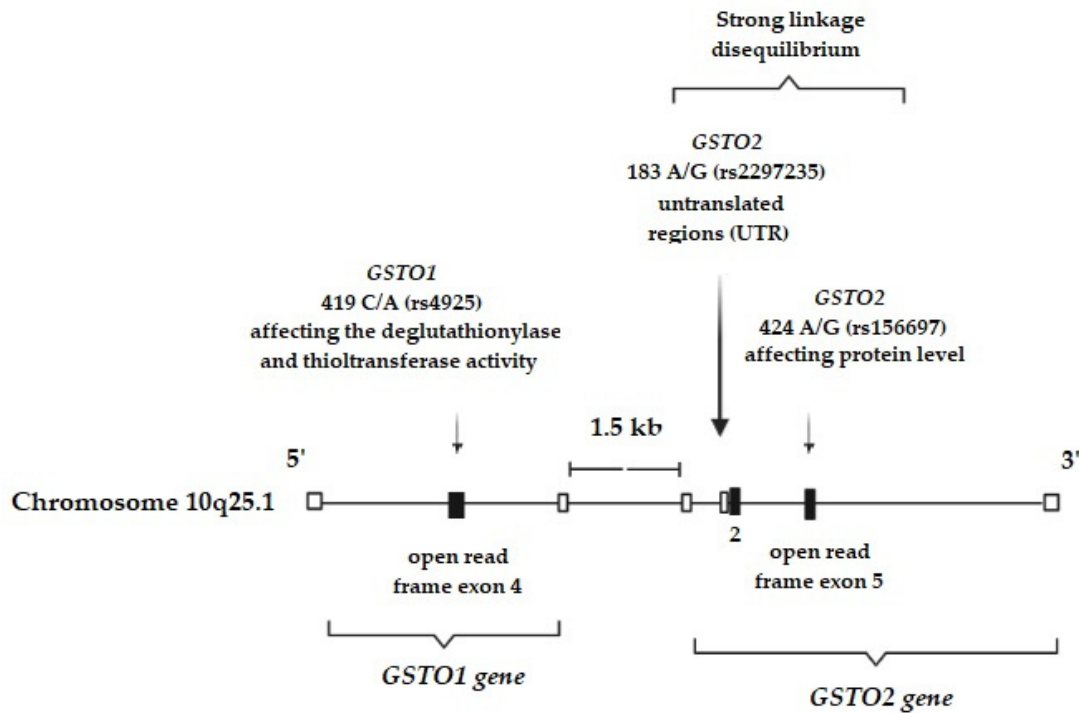

**Figure S1.** Observation of the investigated polymorphisms in *GSTO1* and *GSTO2* genes indicating the SNPs location and the proposed effects

**Table S1.** The individual effect of *GSTO1*\*C419A (rs4925), *GSTO2*\*A424G (rs156697), and *GSTO2*\*A183G (rs2297235) polymorphisms on the risk for seminoma development

| Genotype               | Patients with Seminoma<br>n (%) | Controls<br>n (%) | Crude OR1 <sup>1</sup><br>(95% CI) | <i>p</i> | OR2 <sup>2</sup><br>(95% CI) | <i>p</i> |
|------------------------|---------------------------------|-------------------|------------------------------------|----------|------------------------------|----------|
| <i>GSTO1</i> rs4925    |                                 |                   |                                    |          |                              |          |
| *A/A                   | 4 (8)                           | 13 (14)           | 1.00                               | -        | 1.00                         | -        |
| *C/A*C/C               | 47 (92)                         | 82 (86)           | 1.86 (0.57-6.04)                   | 0.300    | 2.88 (0.83-9.93)             | 0.094    |
| <i>GSTO2</i> rs156697  |                                 |                   |                                    |          |                              |          |
| *A/A                   | 16 (33)                         | 50 (52)           | 1.00                               | -        | 1.00                         | -        |
| *A/G*G/G               | 33 (67)                         | 46 (48)           | 2.24 (1.09-4.60)                   | 0.028    | 2.34 (0.86-6.40)             | 0.095    |
| <i>GSTO2</i> rs2297235 |                                 |                   |                                    |          |                              |          |
| *A/A                   | 18 (35)                         | 49 (51)           | 1.00                               | -        | 1.00                         | -        |
| *A/G*G/G               | 34 (65)                         | 47 (49)           | 1.97 (0.98-3.95)                   | 0.057    | 1.25 (0.46-3.42)             | 0.657    |

<sup>1</sup>OR1 crude odds ratio; <sup>2</sup>OR2 adjusted to the other two remaining genotypes; CI- Confidence interval; 1.00- Reference group.
